# Supplementary material for: A bibliometric analysis of COVID-19 publications in neurology by using the visual mapping method
Source: Frontiers journal article supplement (doi:10.3389/fpubh.2022.937008), 2022-07-25
Supplement: Table_1.pdf [file Table_1.pdf]

Table S1. Thesaurus

| label                                         | replace by                 |
|-----------------------------------------------|----------------------------|
| coronavirus disease 2019                      | covid-19                   |
| coronavirus disease 2019 (covid-19)           | covid-19                   |
| covid                                         | covid-19                   |
| covid 19                                      | covid-19                   |
| covid-19 pandemic                             | covid-19                   |
| coronavirus infections                        | covid-19                   |
| covid-19 pandemic                             | covid-19                   |
| health care workers                           | health care worker         |
| coronavirus                                   | sars-cov-2                 |
| alzheimers-disease                            | alzheimer's disease        |
| blood-brain-barrier                           | blood-brain barrier        |
| central-nervous-system                        | central nervous system     |
| cns                                           | central nervous system     |
| cerebrospinal-fluid                           | cerebrospinal fluid        |
| converting enzyme 2                           | ace2                       |
| eeg                                           |                            |
| guillain-barre-syndrome                       | guillain-barre syndrome    |
| infections                                    | infection                  |
| ischemic-stroke                               | ischemic stroke            |
| multiple-sclerosis                            | multiple sclerosis         |
| parkinsons-disease                            | parkinson's disease        |
| risk-factors                                  | risk factors               |
| seizures                                      | seizure                    |
| system                                        |                            |
| sars                                          | sars-cov-2                 |
| sars-cov-2 infection                          | sars-cov-2                 |
| sars-cov2                                     | sars-cov-2                 |
| nervous system                                | central nervous system     |
| neurologic manifestations                     | neurological manifestation |
| neurological disorders                        | neurological diseases      |
| neurological symptoms                         | neurological manifestation |
| neurological manifestations                   | neurological manifestation |
| severe acute respiratory syndrome coronavirus | sars-cov-2                 |
